# Supplementary material for: Treatment Resistance: A Time-Based Approach for Early Identification in First Episode Psychosis
Source: MDPI journal article supplement (doi:10.3390/jpm11080711), 2021-07-24
Supplement: s1 [file s1]

**Table S1.** Factors Associated with Probable TR (<50% improvement on total symptoms).

| Characteristic                   | Probable TR (n = 34) | Non TR (n = 58) | t/X2   | df    | sig     |
|----------------------------------|----------------------|-----------------|--------|-------|---------|
| PAS (M/SD)                       | 0.37/0.17            | 0.28/0.16       | -2.526 | 80    | 0.014 * |
| DUP (weeks) (M/SD)               | 104.04/134.98        | 68.10/105.38    | -1.421 | 90    | 0.159   |
| DUI (weeks) (M/SD)               | 386.21/340.78        | 236.31/211.28   | -2.313 | 48.37 | 0.025 * |
| Age of onset (M/SD)              | 23.96/8.66           | 24.45/7.80      | 0.275  | 90    | 0.784   |
| SAPS baseline (M/SD)             | 9.35/3.52            | 11.21/3.47      | 2.463  | 90    | 0.016 * |
| SANS baseline (M/SD)             | 11.38/4.64           | 13.47/5.35      | 1.89   | 90    | 0.062   |
| Total symp change ratio 1 month  | 16.39                | 37.38           | 2.048  | 57    | 0.003 * |
| Total symp change ratio 2 months | 20.87                | 48.71           | 3.585  | 60    | 0.001 * |
| Substance abuse/dependence       | Y-9; N-25            | Y-14; N-44      | 0.062  | 1     | 0.803   |
| Mode of onset                    | I-23; A-9            | I-44; A-14      | 0.172  | 1     | 0.678   |
| Gender                           | M-28; F-6            | M-45; F-13      | 0.297  | 1     | 0.586   |
| Family History                   | Y-12; N-16           | Y-20; N-33      | 0.201  | 1     | 0.654   |
| Number of AP switches (M/SD)     | 0.2941               | 0.2759          | -0.186 | 90    | 0.853   |
| Cpz eq at 6 months (M/SD)        | 249.51               | 213.92          | -0.884 | 56.36 | 0.381   |

PAS = premorbid adjustment scale. DUP = duration untreated psychosis. DUI = duration untreated illness. TR = Treatment Resistance. SANS/SAPS = Scale for the Assessment of Negative/Positive Symptoms. Total symp change ratio is difference between baseline symptoms and 1, and 2 month symptoms/Baseline symptoms. I = insidious. A = acute. Y = yes. N = no. M = male. F = female. AP = antipsychotic. Cpz eq = chlorpromazine equivalence over 6 months. Note that for all t-tests, Levine's test for homogeneity of variances was conducted. For variables showing significant heterogeneity of variance, the corrected *p*-value was used.

**Table S2.** Binary logistic regression analysis of Probable TR total symptom <50% improvement criteria.

| Predictor                             | Odds Ratio (95% CI)    | <i>p</i> -Value |
|---------------------------------------|------------------------|-----------------|
| Premorbid adjustment                  | 35.561 (0.168–7520.22) | 0.168           |
| Duration of untreated illness         | 1.002 (0.999–1.005)    | 0.249           |
| SAPS baseline                         | 1.041 (0.825–1.314)    | 0.733           |
| Total symp change ratio over 1 month  | 0.9(0.936–1.016)       | 0.227           |
| Total symp change ratio over 2 months | 0.963 (0.927–1.001)    | 0.059           |

SAPS: Scale for the Assessment of Positive Symptoms. Total symptom change ratio = (Baseline total symptoms – N month total symptoms)/Baseline total symptoms.  $\chi^2 = 15.90$ ;  $p = 0.007$ , Nagelkerke  $r^2 = 0.426$ ; B = -0.901; SE = 0.329; Wald = 7.501;  $p = 0.006$ ; Exp(B) = 0.406.

**Table S3.** Diagnostic Test Performance of Probable TR using various criteria.

| Domain            | Threshold | Diagnostic Odds Ratio (DOR) | Log DOR | 95% Confidence Intervals | Total Accuracy |
|-------------------|-----------|-----------------------------|---------|--------------------------|----------------|
| Positive Symptoms | <20%      | N/A                         | N/A     | N/A                      | 86%            |
|                   | <50%      | 6.67                        | 0.824   | [-0.47, 2.12]            | 83%            |
| Negative Symptoms | <20%      | 1.04                        | 0.017   | [-1.19, 1.16]            | 62%            |
|                   | <50%      | 0.34                        | -0.48   | [-1.64, 0.69]            | 39%            |
| Total symptoms    | <20%      | 5.92                        | 0.77    | [-0.59, 2.13]            | 83%            |
|                   | <50%      | 2.24                        | 0.351   | [-0.77, 1.47]            | 64%            |

N/A = not available.

**Table S4.** Details of medications prescribed at baseline and by 6 months.

| Name of the Antipsychotic Drug | Number at Baseline | Number at 6-Months | Exposure by 6-Months | Dose Range |
|--------------------------------|--------------------|--------------------|----------------------|------------|
| Chlorpromazine                 | 1                  | 0                  | 1.09%                | 50 mg/d    |

|                     |    |    |        |              |
|---------------------|----|----|--------|--------------|
| Clozapine           | 0  | 1  | 1.09%  | 375 mg/d     |
| Flupentixol (depot) | 1  | 4  | 4.35%  | 20–50 mg/d   |
| Haloperidol (oral)  | 3  | 1  | 3.26%  | 5–10 mg/d    |
| No antipsychotics   | 51 | 0  | 0.00%  | N/A          |
| Olanzapine          | 15 | 34 | 36.96% | 5–35 mg/d    |
| Quetiapine          | 1  | 6  | 6.52%  | 300–550 mg/d |
| Risperidone         | 24 | 43 | 46.74% | 1–8 mg/d     |
| Ziprasidone         | 0  | 6  | 6.52%  | 40–160 mg/d  |

The dose range refers to the variation noted across individuals in the recorded dose at the time of assessment. This does not reflect the various doses that were prescribed to an individual when the medications were initiated or titrated before or after the point of assessment.
